# Supplementary material for: Mutation of the Conserved Threonine 8 within the Human ARF Tumour Suppressor Protein Regulates Autophagy
Source: MDPI journal article supplement (doi:10.3390/biom12010126), 2022-01-13
Supplement: s1 [file s1]

## Supplementary Figure S1

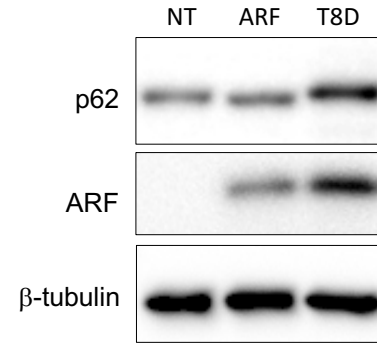

Fig S1. HeLa cells were transfected with the indicated plasmids. Cell extracts were subjected to SDS-page and incubated with anti-ARF antibody to check exogenous expression, tubulin as a loading control and anti p62 as autophagic marker. Representative images of three independent experiments are shown.
